# Supplementary material for: Isolation and Structural Elucidation of Compounds from Pleiocarpa bicarpellata and Their In Vitro Antiprotozoal Activity
Source: MDPI journal article supplement (doi:10.3390/molecules27072200), 2022-03-28
Supplement: s1 [file s1]

# Isolation and Structural Elucidation of Compounds from *Pleiocarpa bicarpellata* and Their In Vitro Antiprotozoal Activity

Ozlem Sevik Kilicaslan <sup>1,2</sup>, Sylvian Cretton <sup>1,2</sup>, Luis Quirós-Guerrero <sup>1,2</sup>, Merveilles A. Bella <sup>3</sup>, Marcel Kaiser <sup>4,5</sup>, Pascal Mäser <sup>4,5</sup>, Joseph T. Ndong <sup>3</sup> and Muriel Cuendet <sup>1,2,\*</sup>

<sup>1</sup> School of Pharmaceutical Sciences, University of Geneva, 1211 Geneva, Switzerland; ozlem.sevik@unige.ch (O.S.K.); sylvian.cretton@unige.ch (S.C.); luis.guerrero@unige.ch (L.Q.-G.)

<sup>2</sup> Institute of Pharmaceutical Sciences of Western Switzerland, University of Geneva, 1211 Geneva, Switzerland

<sup>3</sup> Department of Chemistry, Higher Teacher Training College, University of Yaoundé 1, Yaoundé P.O. Box 47, Cameroon; bella\_aurore@yahoo.fr (M.A.B.); thierry.ndongo@ens.cm (J.T.N.)

<sup>4</sup> Swiss Tropical and Public Health Institute, 4002 Basel, Switzerland; marcel.kaiser@swisstph.ch (M.K.); pascal.maeser@swisstph.ch (P.M.)

<sup>5</sup> University of Basel, 4003 Basel, Switzerland

\* Correspondence: muriel.cuendet@unige.ch

## Table of content

|                                                                                                                                                                                            |    |
|--------------------------------------------------------------------------------------------------------------------------------------------------------------------------------------------|----|
| <b>Figure S1.</b> Molecular network from <i>Pleiocarpa bicarpellata</i> extracts. Nodes with yellow circles represent ions dereplicated by GNPS and ISDB, and identified as alkaloids..... | 3  |
| <b>Figure S2.</b> IR spectrum of <b>7</b> . ....                                                                                                                                           | 3  |
| <b>Figure S3.</b> UV spectrum of <b>7</b> . ....                                                                                                                                           | 4  |
| <b>Figure S4.</b> HRESIMS spectrum of <b>7</b> (Q Exactive Focus Hybrid quadrupole-orbitrap mass spectrometer, positive mode).....                                                         | 4  |
| <b>Figure S5.</b> <sup>1</sup> H NMR (600 MHz, CD <sub>3</sub> OD) spectrum of <b>7</b> . ....                                                                                             | 5  |
| <b>Figure S6.</b> DEPTQ NMR (150 MHz, CD <sub>3</sub> OD) spectrum of <b>7</b> .....                                                                                                       | 5  |
| <b>Figure S7.</b> COSY (600 MHz, CD <sub>3</sub> OD) spectrum of <b>7</b> . ....                                                                                                           | 6  |
| <b>Figure S8.</b> HSQC (600 MHz, CD <sub>3</sub> OD) spectrum of <b>7</b> .....                                                                                                            | 6  |
| <b>Figure S9.</b> HMBC (600 MHz, CD <sub>3</sub> OD) spectrum of <b>7</b> .....                                                                                                            | 7  |
| <b>Figure S10.</b> ROESY (600 MHz, CD <sub>3</sub> OD) spectrum of <b>7</b> . ....                                                                                                         | 7  |
| <b>Figure S11.</b> UV spectrum of <b>15</b> . ....                                                                                                                                         | 8  |
| <b>Figure S12.</b> HRESIMS spectrum of <b>15</b> (Q Exactive Focus Hybrid quadrupole-orbitrap mass spectrometer, positive mode). ....                                                      | 8  |
| <b>Figure S13.</b> <sup>1</sup> H NMR (600 MHz, CD <sub>3</sub> OD) spectrum of <b>15</b> . ....                                                                                           | 9  |
| <b>Figure S14.</b> DEPTQ NMR (150 MHz, CD <sub>3</sub> OD) spectrum of <b>15</b> .....                                                                                                     | 9  |
| <b>Figure S15.</b> COSY (600 MHz, CD <sub>3</sub> OD) spectrum of <b>15</b> . ....                                                                                                         | 10 |
| <b>Figure S16.</b> HSQC (600 MHz, CD <sub>3</sub> OD) spectrum of <b>15</b> .....                                                                                                          | 10 |
| <b>Figure S17.</b> HMBC (600 MHz, CD <sub>3</sub> OD) spectrum of <b>15</b> .....                                                                                                          | 11 |
| <b>Figure S18.</b> ROESY (600 MHz, CD <sub>3</sub> OD) spectrum of <b>15</b> .....                                                                                                         | 11 |

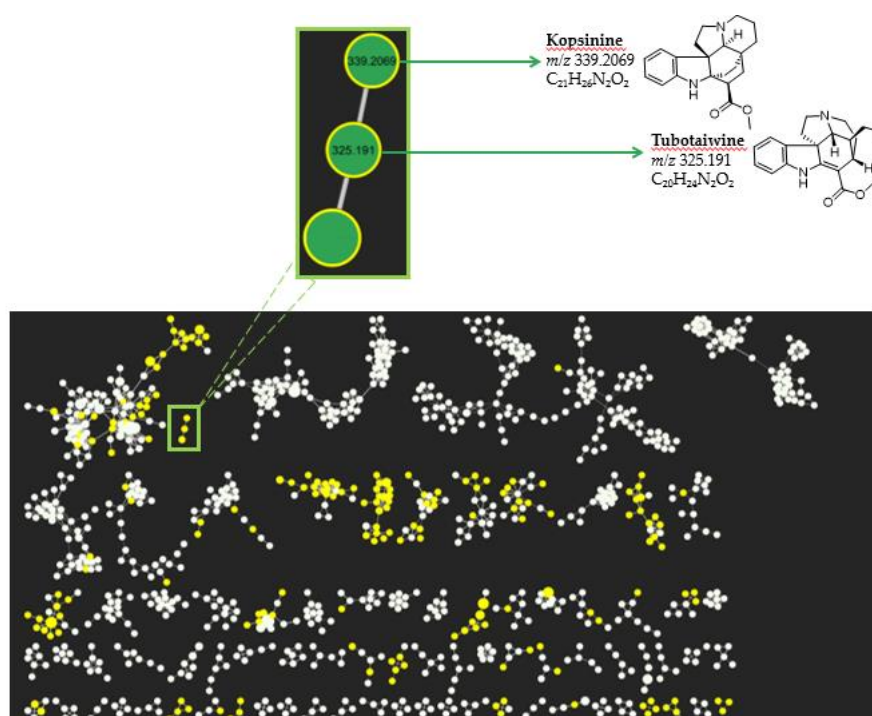

**Figure S1.** Molecular network from *Pleiocarpa bicarpellata* extracts. Nodes with yellow circles represent ions dereplicated by GNPS and ISDB, and identified as alkaloids.

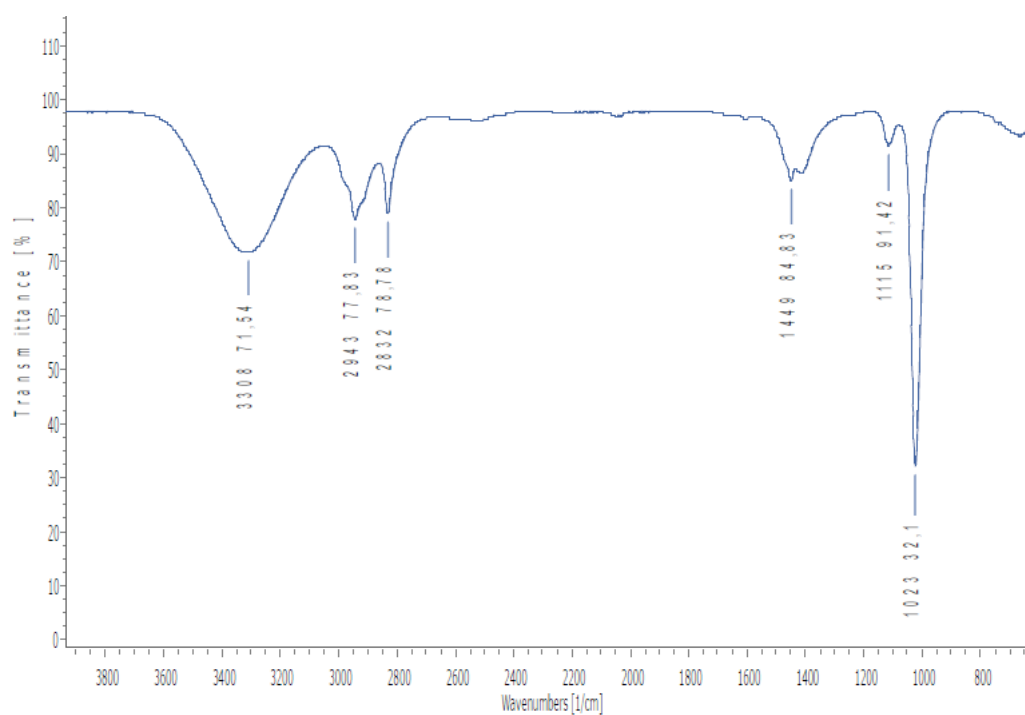

**Figure S2.** IR spectrum of **7**.

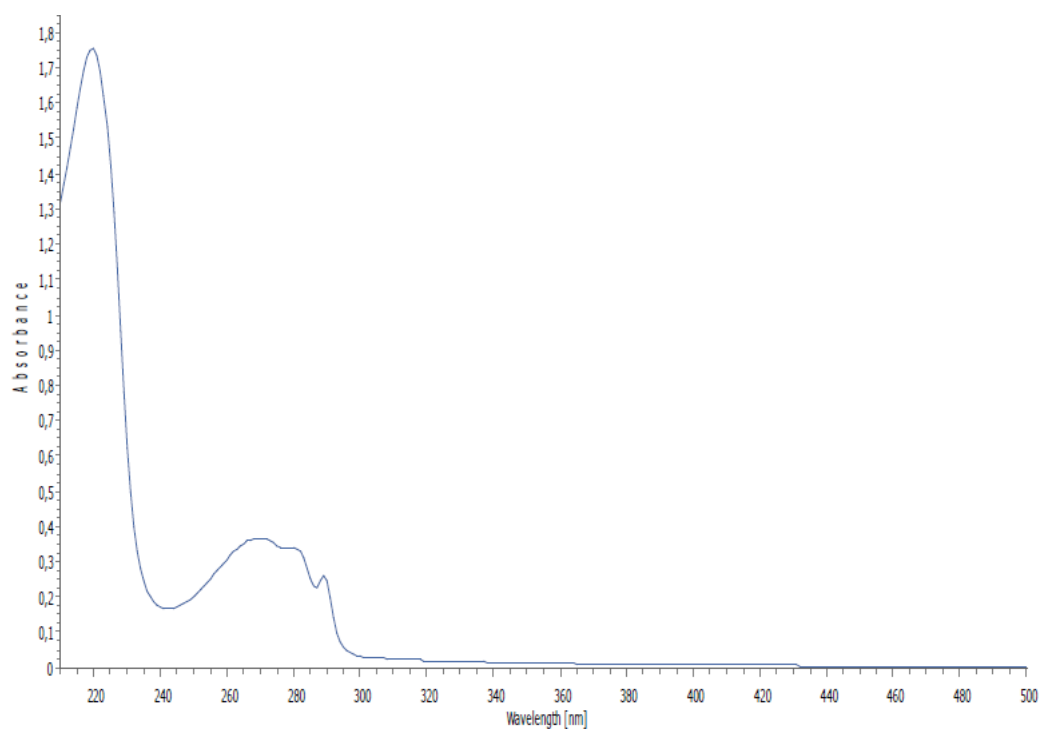

**Figure S3.** UV spectrum of **7**.

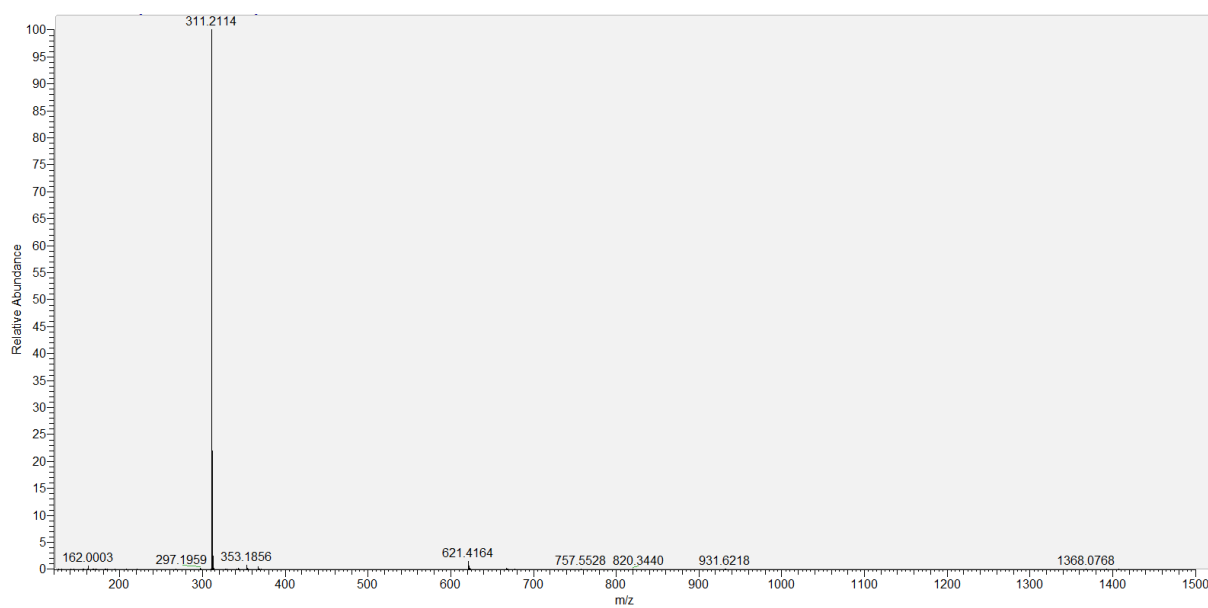

**Figure S4.** HRESIMS spectrum of **7** (Q Exactive Focus Hybrid quadrupole-orbitrap mass spectrometer, positive mode).

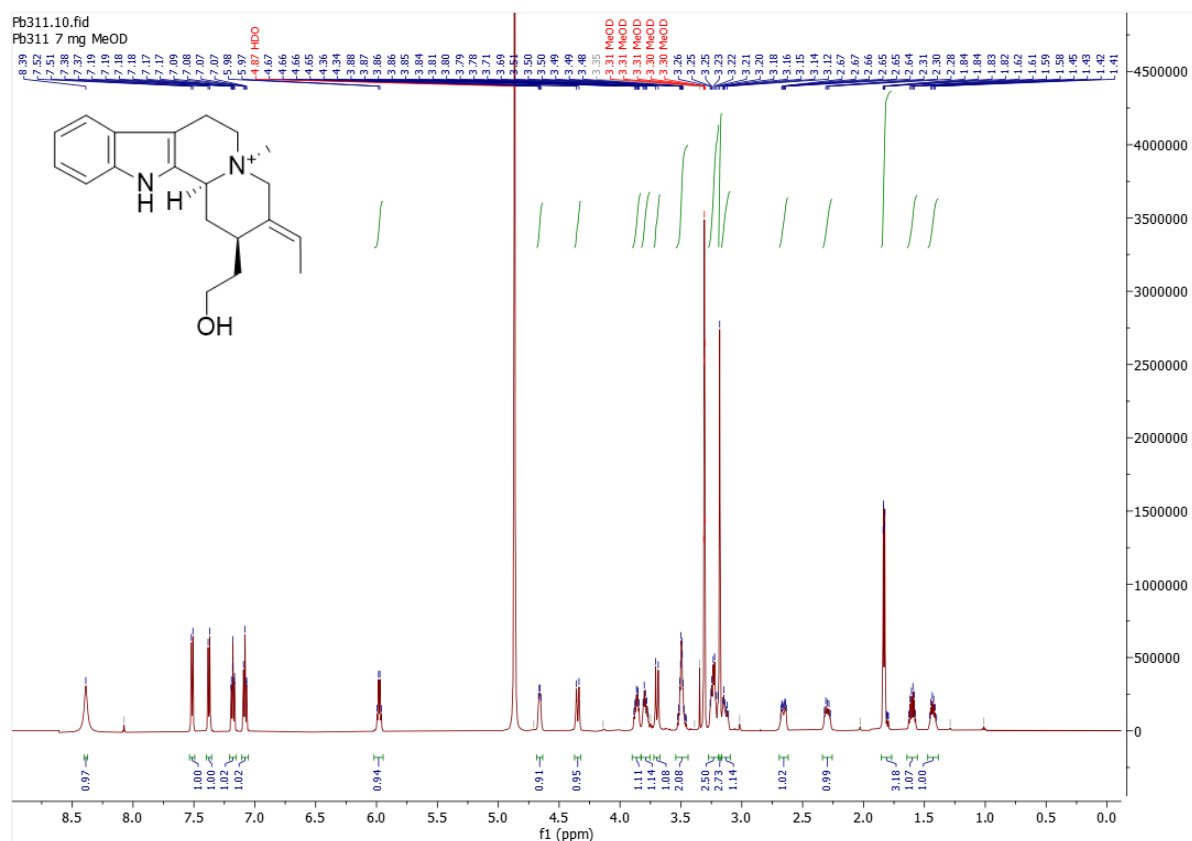

Figure S5.  $^1\text{H}$  NMR (600 MHz,  $\text{CD}_3\text{OD}$ ) spectrum of 7.

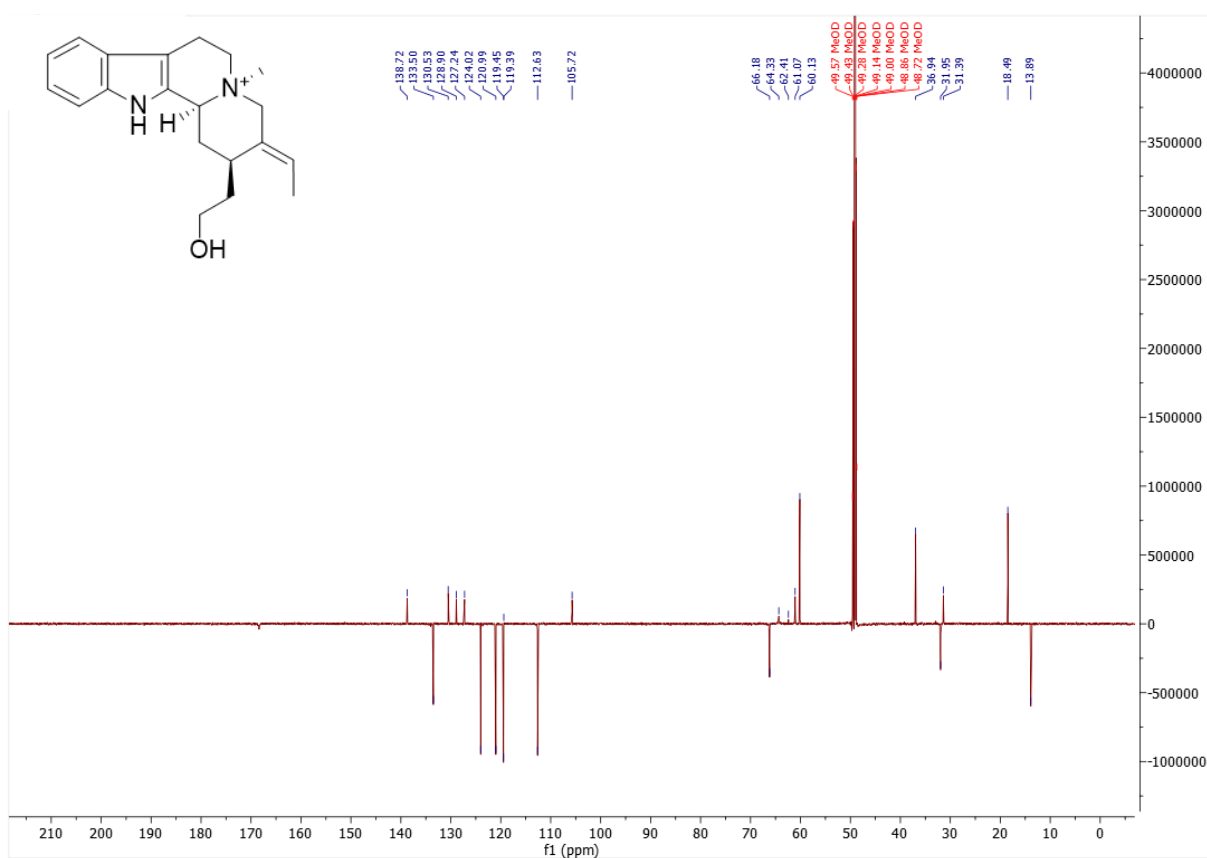

Figure S6. DEPTQ NMR (150 MHz,  $\text{CD}_3\text{OD}$ ) spectrum of 7.

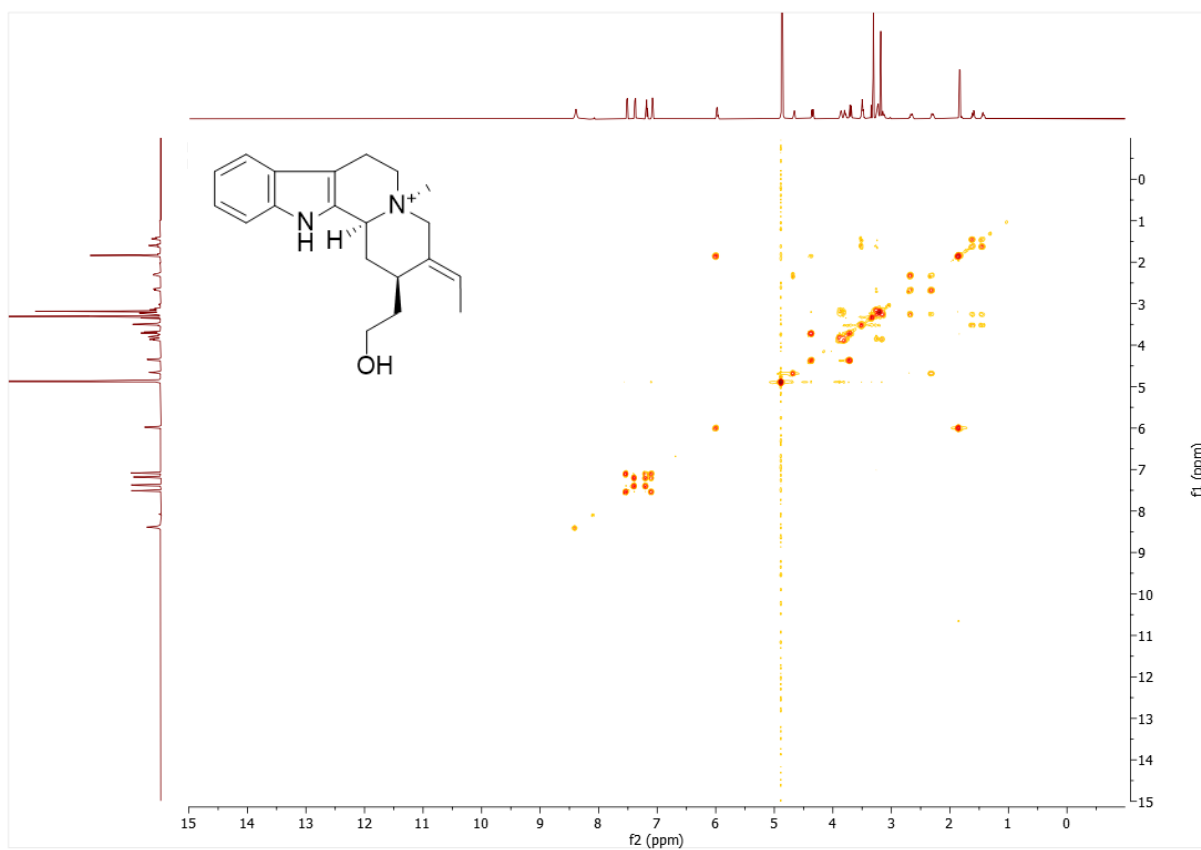

**Figure S7.** COSY (600 MHz, CD<sub>3</sub>OD) spectrum of **7**.

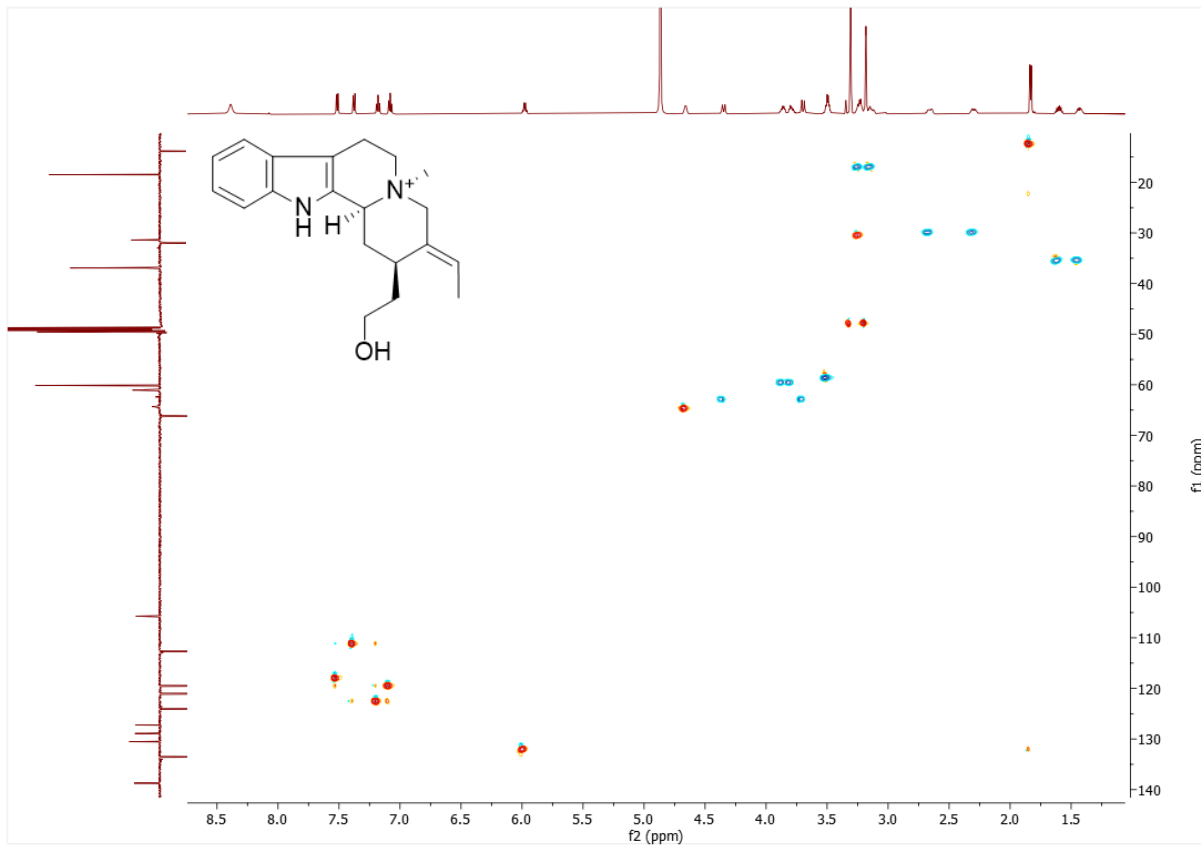

**Figure S8.** HSQC (600 MHz, CD<sub>3</sub>OD) spectrum of **7**.

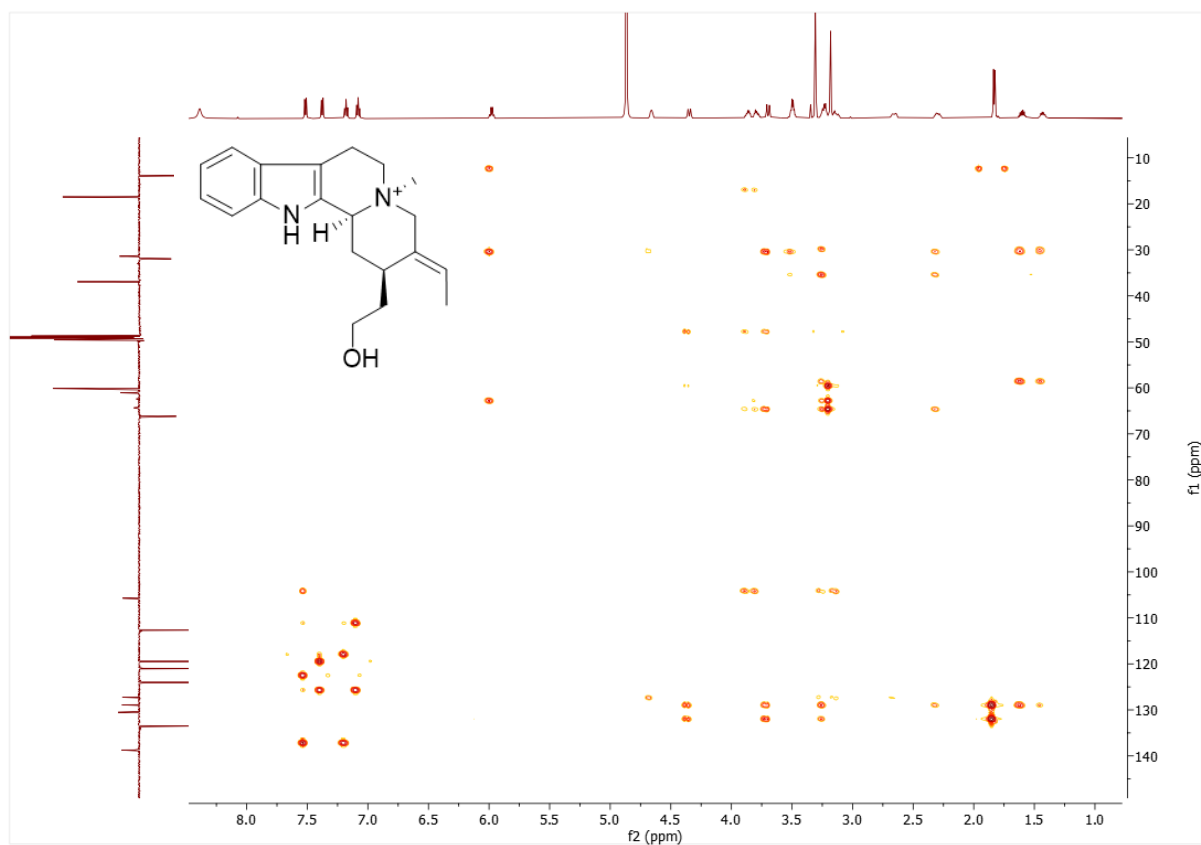

**Figure S9.** HMBC (600 MHz, CD<sub>3</sub>OD) spectrum of **7**.

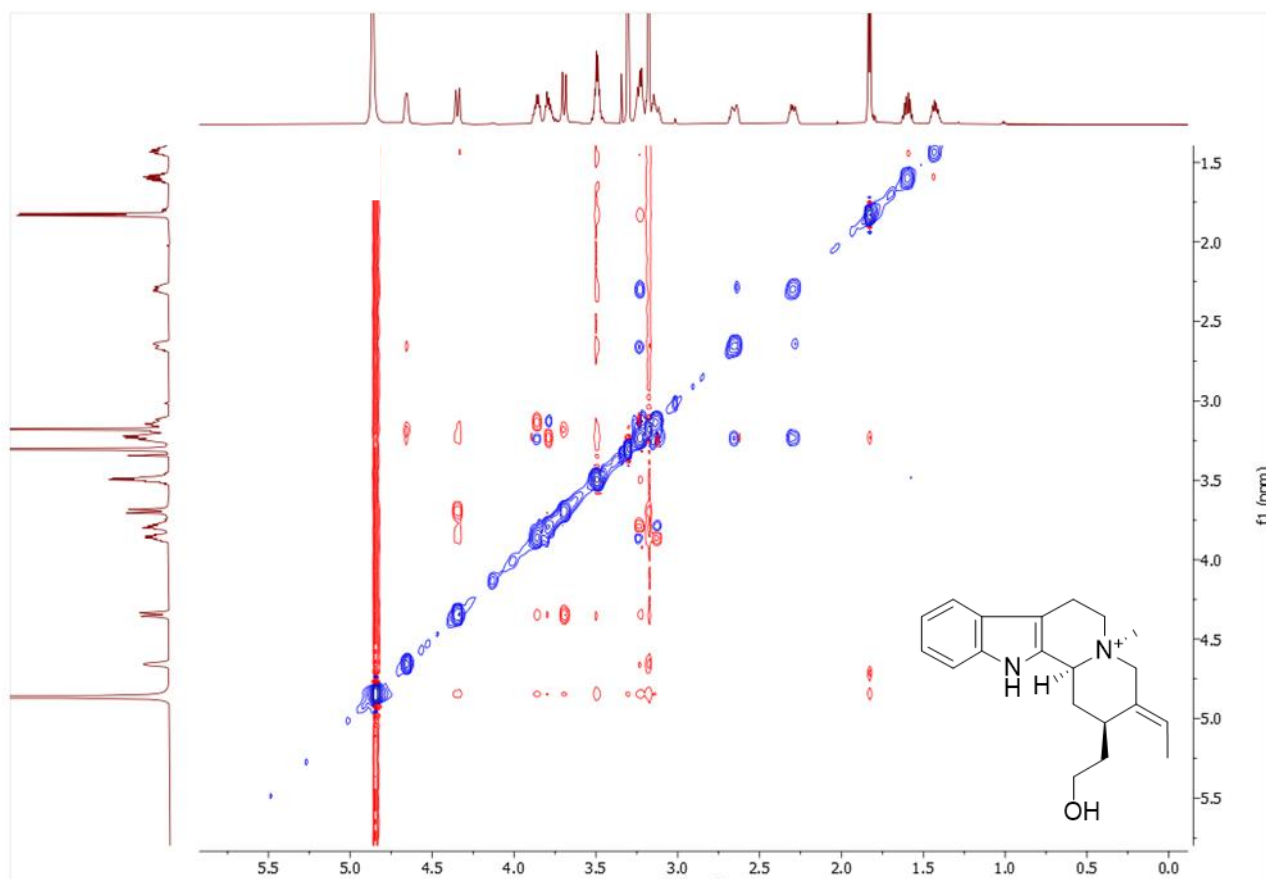

**Figure S10.** ROESY (600 MHz, CD<sub>3</sub>OD) spectrum of **7**.

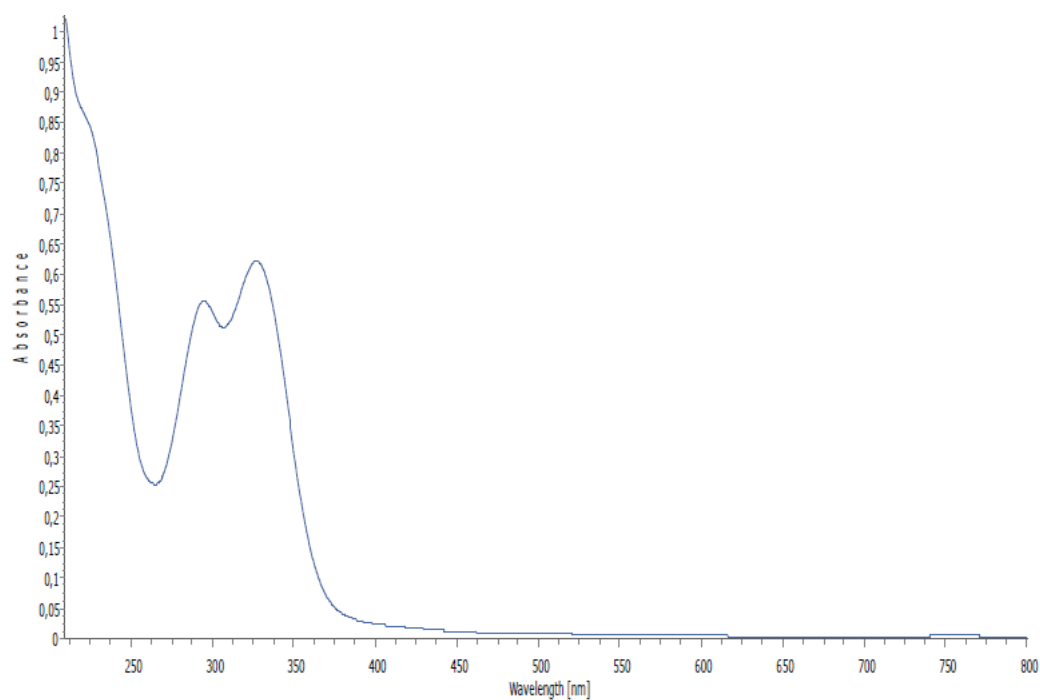

**Figure S11.** UV spectrum of **15**.

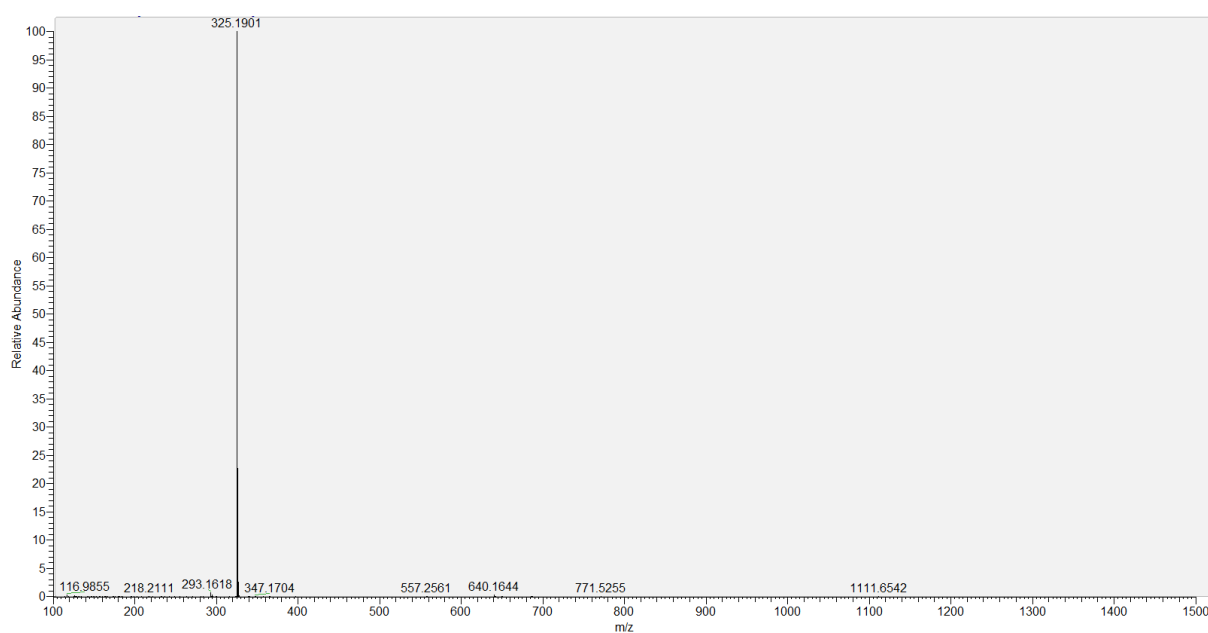

**Figure S12.** HRESIMS spectrum of **15** (Q Exactive Focus Hybrid quadrupole-orbitrap mass spectrometer, positive mode).



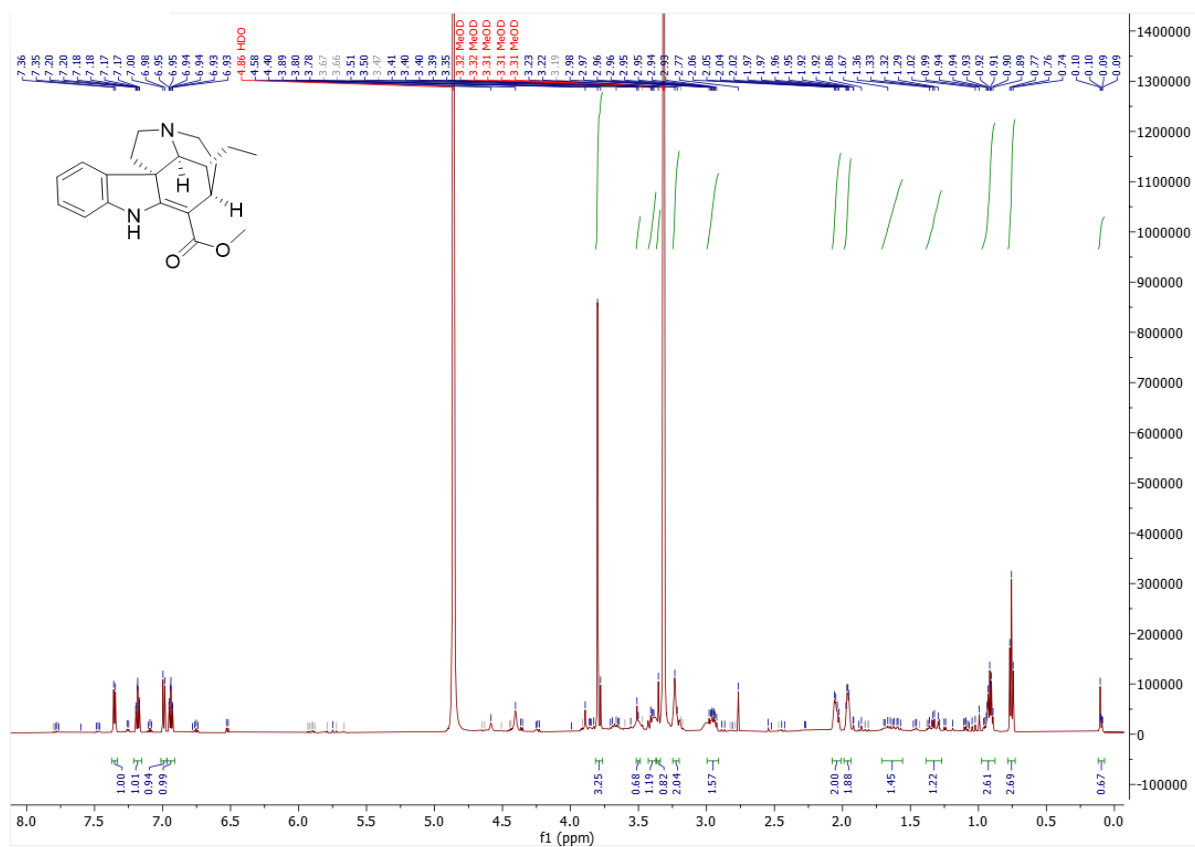

**Figure S13.** <sup>1</sup>H NMR (600 MHz, CD<sub>3</sub>OD) spectrum of **15**.

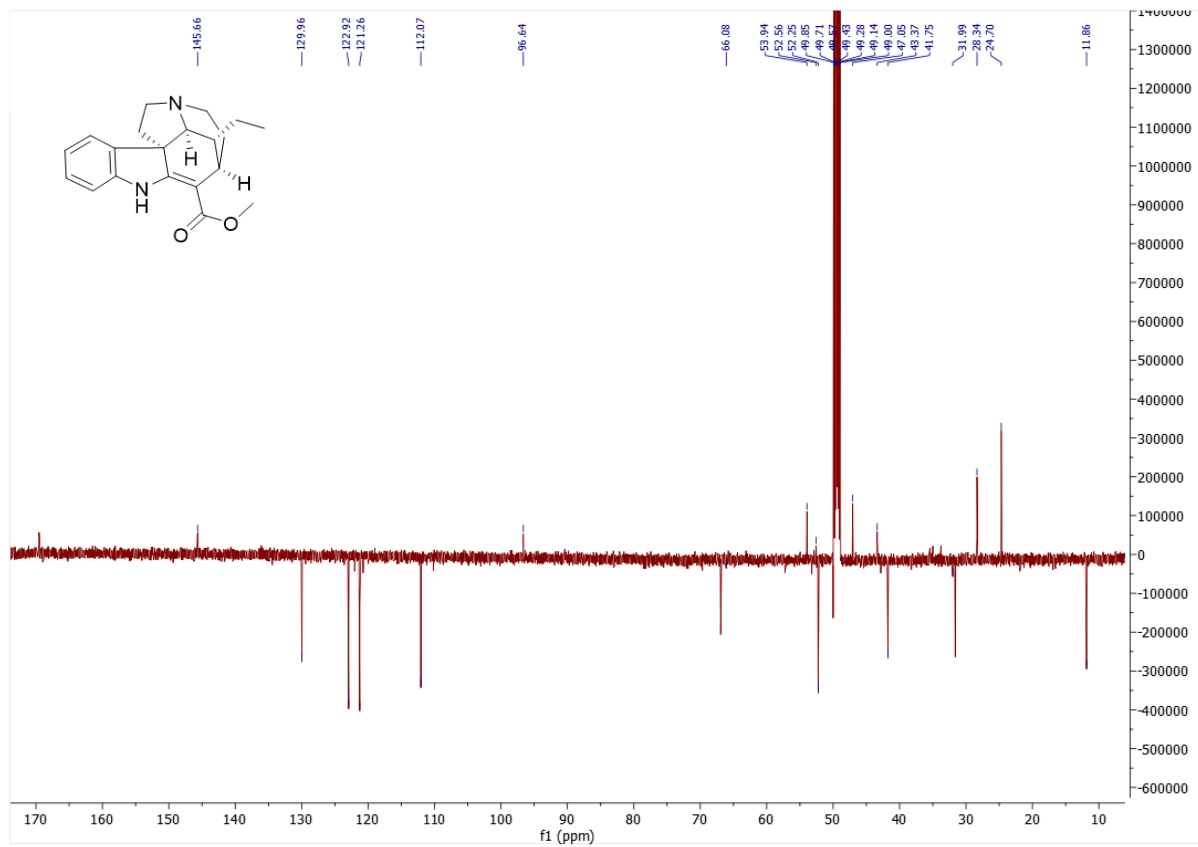

**Figure S14.** DEPTQ NMR (150 MHz, CD<sub>3</sub>OD) spectrum of **15**.

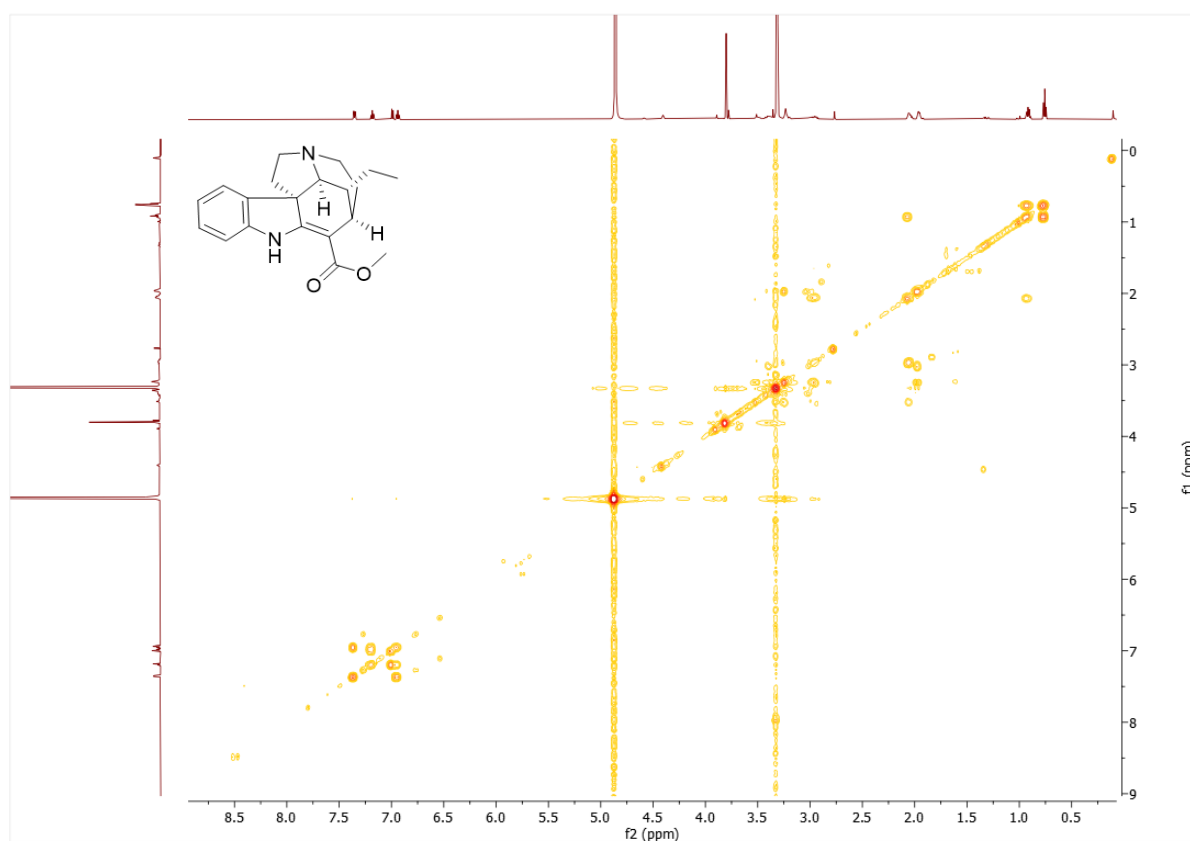

**Figure S15.** COSY (600 MHz, CD<sub>3</sub>OD) spectrum of **15**.

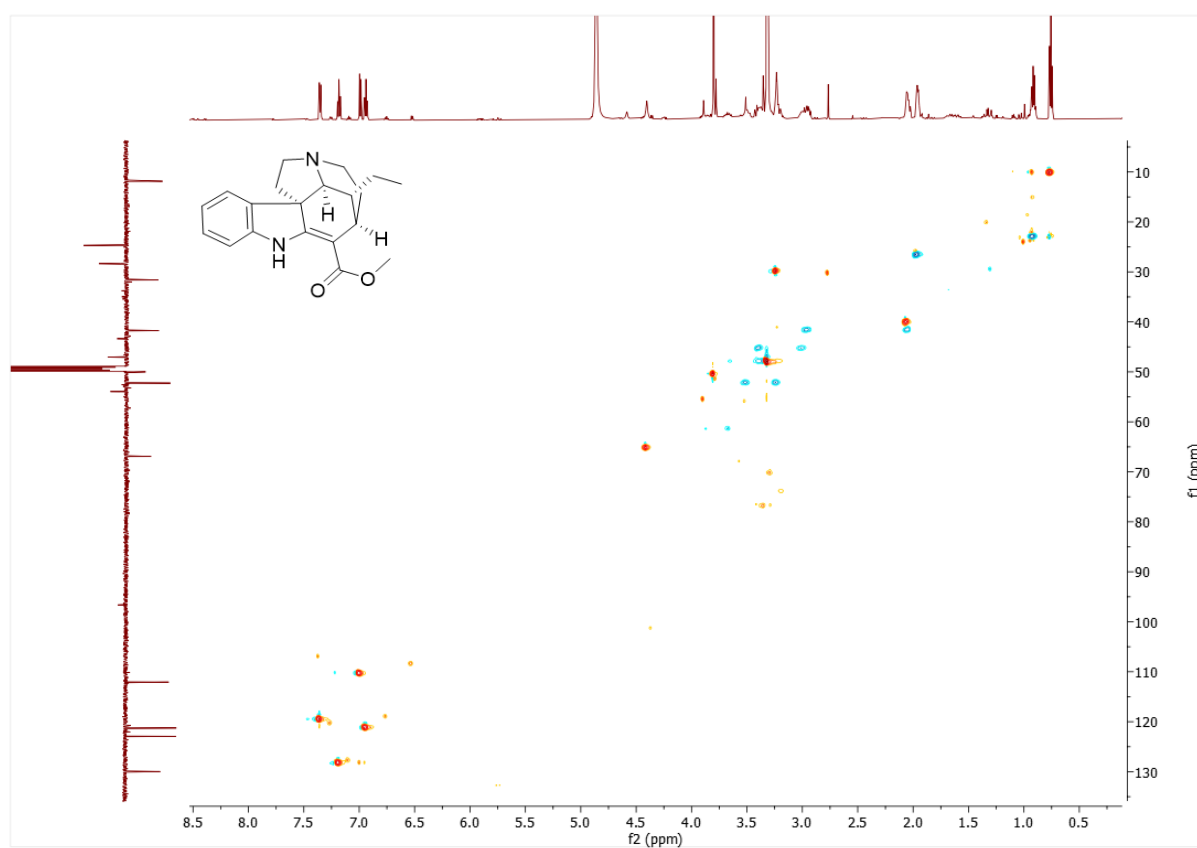

**Figure S16.** HSQC (600 MHz, CD<sub>3</sub>OD) spectrum of **15**.

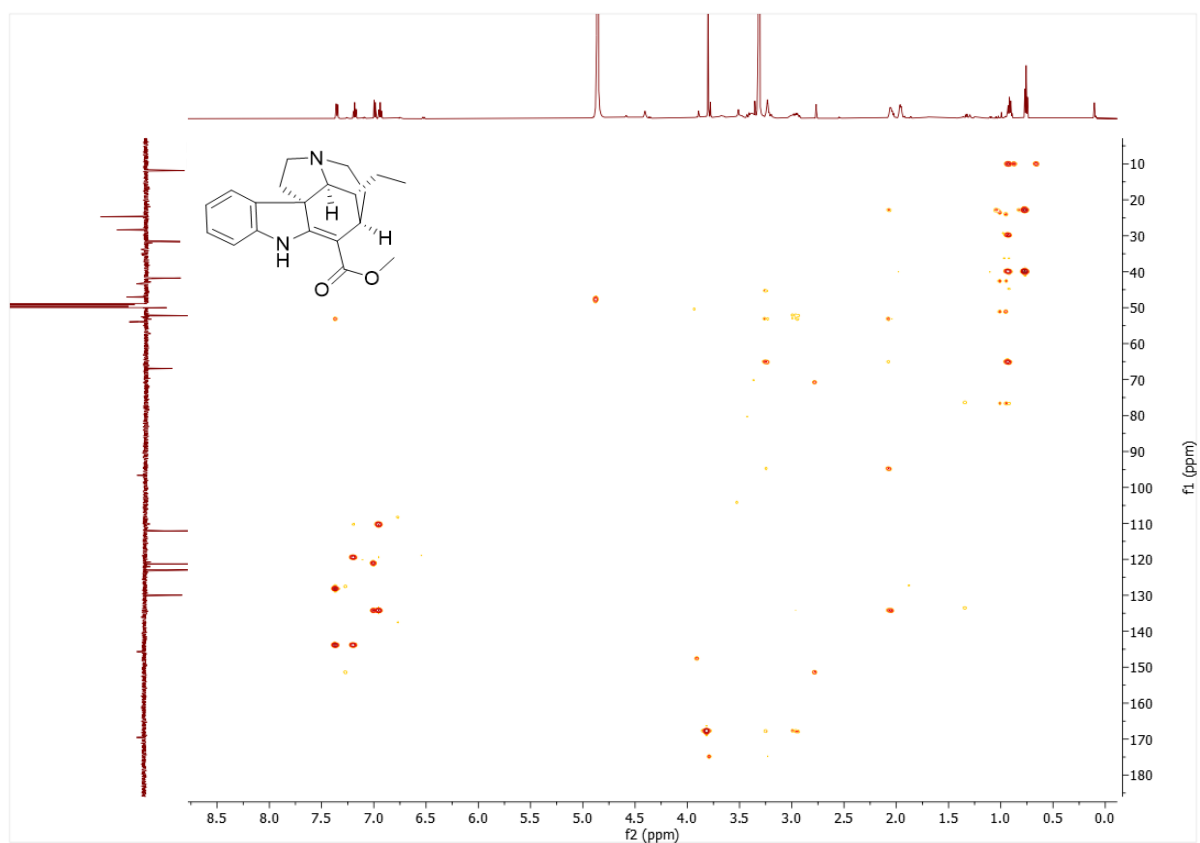

**Figure S17.** HMBC (600 MHz, CD<sub>3</sub>OD) spectrum of **15**.

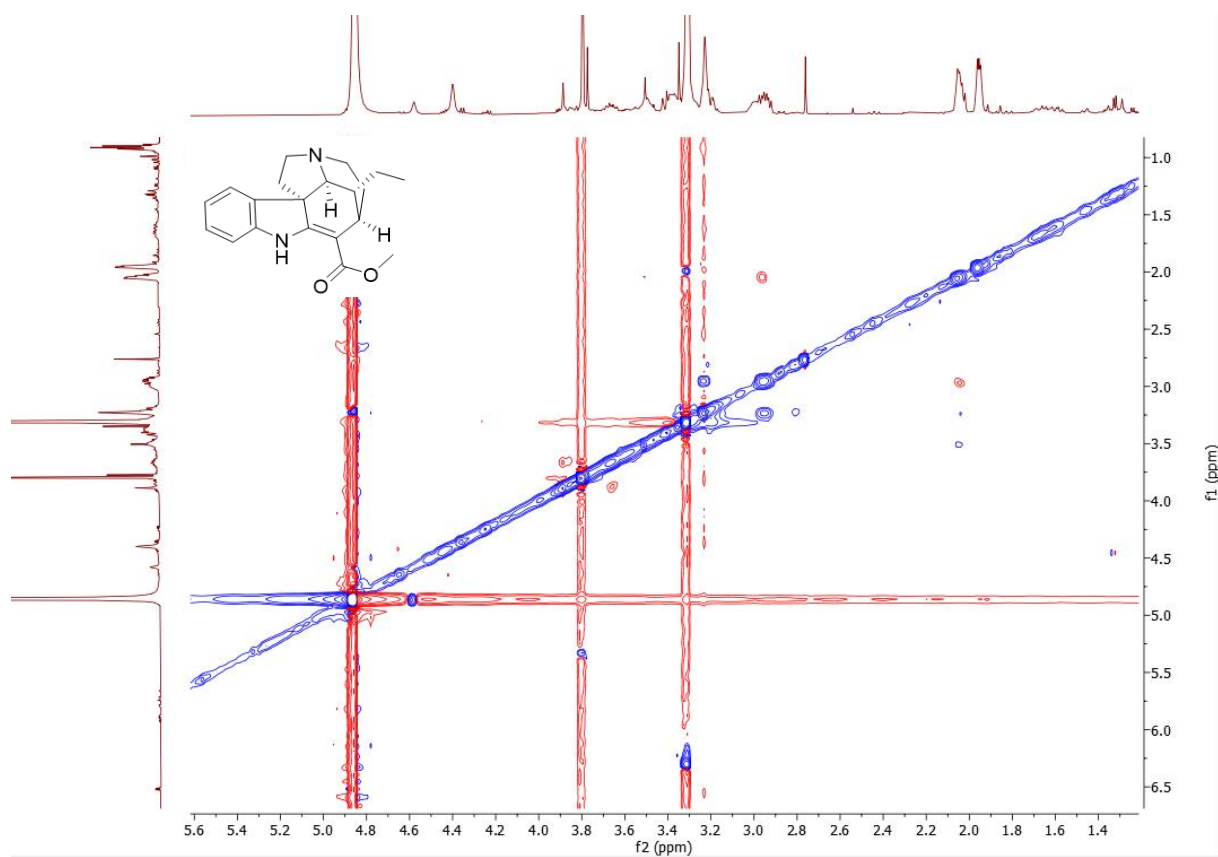

**Figure S18.** ROESY (600 MHz, CD<sub>3</sub>OD) spectrum of **15**
